# Supplementary material for: Identification and Functional Characterization of IDS Gene Mutations Underlying Taiwanese Hunter Syndrome (Mucopolysaccharidosis Type II)
Source: MDPI journal article supplement (doi:10.3390/ijms21010114), 2019-12-23
Supplement: s1 [file s1]

**Supplementary Table 2.**

| <b>Mutants</b> | <b>Forward primers(5'-3')</b>             | <b>Reverse primers(5'-3')</b>             |
|----------------|-------------------------------------------|-------------------------------------------|
| c.137A>C       | ATCATCGTGGATGCCCTGCGCCCTCC                | GGAGGGGCGCAGGGCATCCACGATGAT               |
| c.142C>T       | GTGGATGACCTGTGCCCTCCCTGG                  | CCAGGGAGGGGCACAGGTCATCCAC                 |
| c.254C>T       | AGCAGTGTGCGTCCCGAGCCGCG                   | CGCGGCTCGGGACGCACACTGCT                   |
| c.311A>T       | CCACCCGCCTGTACGTCTCAACTCCTACTG            | CAGTAGGAGTTGAAGACGTACAGGCGGGTGG           |
| c.454A>C       | ACCATACCGATGATTCTCGTATCGCTGGTCTTTTC       | GAAAAGACCAGCGATACGGAGAATCATCGGTATGGT      |
| c.589C>T       | CCGAGGGCACCTTGTCTGACAAACAGAGC             | GCTCTGTTTGTGAGACAAGGTGCCCTCGG             |
| c.778C>T       | GGTCCCTGATGGCCTATCCCTGTGGC                | GCCACAGGGGATAGGCCATCAGGGACC               |
| c.797C>G       | CTGTGGCCTACAACCGCTGGATGGACATCAG           | CTGATGTCCATCCAGCGTTGTAGGCCACAG            |
| c.817C>T       | GGATGGACATCAGGCAATGGGAAGACGTCCA           | TGGACGTCTTCCATTGCCTGATGTCCATCC            |
| c.851C>T       | CCTTAAACATCAGTGTGCTGTATGGTCCAATTCCTGT     | ACAGGAATTGGACCATACAGCACACTGATGTTTAAGG     |
| c.998C>T       | AGCACCATCATTGCATTTACCTTGGATCATGGGTGG      | CCACCCATGATCCAAGGTAATGCAATGATGGTGCT       |
| c.1106C>G      | CTGGAAGGACGGCTTGACTTCCGGAGGC              | GCCTCCGGAAGTCAAGCCGCTCTCCAG               |
| c.1400C>T      | GCCTATAGCCAGTATCTCCGGCCTTCAGAC            | GTCTGAAGCCGGAGATACTGGCTATAGGC             |
| c.1402C>T      | CTATAGCCAGTATCCCTGGCCTTCAGACATCC          | GGGATGTCTGAAGGCCAGGATACTGGCTATAG          |
| c.1403G>A      | ATAGCCAGTATCCCCAGCCTTCAGACATCCC           | GGGATGTCTGAAGGCTGGGGATACTGGCTAT           |
| c.1478G>A      | GATCATGGGCTATTCCATACACACCATAGACTATAGGTATA | TATACCTATAGTCTATGGTGTGTATGGAATAGCCCATGATC |
| c.1499C>T      | ACGCACCATAGACTATAGGTATATTGTGTGGGTTGG      | CCAACCCACACAATATACCTATAGTCTATGGTGCGT      |
