# Supplementary material for: Identification and Functional Characterization of IDS Gene Mutations Underlying Taiwanese Hunter Syndrome (Mucopolysaccharidosis Type II)
Source: MDPI journal article supplement (doi:10.3390/ijms21010114), 2019-12-23
Supplement: s1 [file s1]

**Supplementary Table 1.**

| <b>Transfected vector</b> | <b>IDS activity</b><br>( $\mu\text{mole/g protein/ 4hr}$ ) | <b>Total</b><br>(percentage of wild-type) |
|---------------------------|------------------------------------------------------------|-------------------------------------------|
| Wild-type                 | 641.0 $\pm$ 98.72                                          | 100.0                                     |
| PCMV6-vector              | 0.0 $\pm$ 8.09                                             | 0.0                                       |
| vehicle                   | 12.1 $\pm$ 24.05                                           | 1.9                                       |
| c.137A>C(p.D46A)          | 0.0 $\pm$ 8.56                                             | 0.0                                       |
| c.142C>T (p.R48C)         | 535.6 $\pm$ 48.78                                          | 83.6                                      |
| c.254C>T(p.A85V)          | 134.0 $\pm$ 38.07                                          | 22.6                                      |
| c.311A>T(p.D104V)         | 14.2 $\pm$ 12.98                                           | 2.2                                       |
| c.454A>C (p.S152R)        | 0.0 $\pm$ 9.02                                             | 0.0                                       |
| c.589C>T(p.P197S)         | 480.0 $\pm$ 90.94                                          | 74.9                                      |
| c.778C>T (p.P260S)        | 541.9 $\pm$ 51.5                                           | 84.5                                      |
| c.797C>G (p.P266R)        | 0.0 $\pm$ 8.51                                             | 0.0                                       |
| c.817C>T(p.R273W)         | 14.3 $\pm$ 15.21                                           | 2.2                                       |
| c.851C>T(p.P284L)         | 399.1 $\pm$ 86.34                                          | 62.3                                      |
| c.890G>A(p.R297H)         | 634.3 $\pm$ 88.00                                          | 98.9                                      |
| c.998C>T (p.S333L)        | 0.0 $\pm$ 5.11                                             | 0.0                                       |
| c.1025A>G (p.H342R)       | 268.1 $\pm$ 62.02                                          | 41.8                                      |
| c.1106C>G(p.S369X)        | 0.2 $\pm$ 12.35                                            | 0.0                                       |
| c.1400C>T (p.P467L)       | 0.0 $\pm$ 9.49                                             | 0.0                                       |
| c.1402C>T (p.R468W)       | 0.0 $\pm$ 7.19                                             | 0.0                                       |
| c.1403G>A (p.R468Q)       | 0.0 $\pm$ 8.63                                             | 0.0                                       |
| c.1478G>A,(p.R493H)       | 554.2 $\pm$ 90.10                                          | 86.5                                      |
| c.1499C>T(p.T500I)        | 496.7 $\pm$ 99.85                                          | 77.5                                      |
